# Supplementary material for: Protocol for a parallel assignment prospective, randomised, double-blinded, placebo-controlled trial to evaluate the efficacy of 0.01% atropine for near work-induced transient myopia and myopic progression in China
Source: HighWire-hosted journal article supplement (doi:10.1136/bmjopen-2023-079833), 2023-12-01
Supplement: bmjopen-2023-079833supp001_data_supplement.pdf [file bmjopen-2023-079833supp001_data_supplement.pdf]

**Supplementary Table 1.** The schedule of enrolment, interventions, and assessments of this trial

|                             |               | STUDY PERIOD |                 |         |           |          |          |           |           |
|-----------------------------|---------------|--------------|-----------------|---------|-----------|----------|----------|-----------|-----------|
|                             | Enrolment     | Allocation   | Post-allocation |         |           |          |          |           | Close-out |
| Windows:                    | October -2023 | 2023         | Day 0           | 4W ± 3D | 12 W ± 7D | 24W ± 7D | 36W ± 7D | 48 W ± 7D | End-2025  |
| ENROLMENT:                  |               |              |                 |         |           |          |          |           |           |
| Eligibility screen          | ×             |              |                 |         |           |          |          |           |           |
| Informed consent            | ×             |              |                 |         |           |          |          |           |           |
| Allocation                  |               | ×            |                 |         |           |          |          |           |           |
| INTERVENTIONS:              |               |              |                 |         |           |          |          |           |           |
| [0.01 % atropine eye drops] |               |              | ×               | ×       | ×         | ×        | ×        | ×         |           |
| [placebo eye drops]         |               |              | ×               | ×       | ×         | ×        | ×        | ×         |           |
| ASSESSMENTS:                |               |              |                 |         |           |          |          |           |           |
| [The baseline variables]    | ×             | ×            |                 |         |           |          |          |           |           |
| [The primary outcome]       |               |              | ×               | ×       | ×         | ×        | ×        | ×         |           |
| [The secondary outcome]     |               |              | ×               | ×       | ×         | ×        | ×        | ×         |           |
| [Safety evaluation]         |               |              | ×               | ×       | ×         | ×        | ×        | ×         |           |

W: Weeks; D: Days
